# Supplementary material for: Assessing future impacts of tropical cyclones on global banana production
Source: Copernicus journal article supplement (doi:10.5194/nhess-25-1963-2025), 2025-06-16
Supplement: Supplementary file 1 [file nhess-25-1963-2025-supplement.pdf]

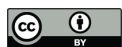

*Supplement of*

## **Assessing future impacts of tropical cyclones on global banana production**

**Sophie Kaashoek et al.**

*Correspondence to:* Marleen C. de Ruiter ([m.c.de.ruiter@vu.nl](mailto:m.c.de.ruiter@vu.nl))

The copyright of individual parts of the supplement might differ from the article licence.

### **Description of sheets**

**Database:** Overview of 22 datasets with related articles.

**Datasets:** Development of damage ratios and vulnerability curve .

**Table S1**

[illegible]

| Country            | Cyclone                  | %destroyed | (m/s) |
|--------------------|--------------------------|------------|-------|
| Dominican republic | Hurricane Isaac          | 10%        | 23    |
| Eastern Jamaica    | Hurricane Grace          | 29%        | 23    |
| Dominican Republic | Storm Erika              | 40%        | 16    |
| Southern Mexico    | Storm Dolores            | 60%        | 27    |
| Dominican Republic | Hurricane Irma           | 60%        | 41    |
| Queensland         | Cyclone Yasi             | 75%        | 36    |
| Dominica           | Storm Erika              | 80%        | 18    |
| Honduras           | Hurrican Eta             | 82%        | 14    |
| Jamaica            | Hurricane Sandy          | 85%        | 34    |
| Australia          | TC Larry                 | 85%        | 45    |
| Australia          | Cyclone Niran            | 90%        | 34    |
| Guadalope          | Hurricane Dean           | 90%        | 45    |
| Puerto Rico        | Hurricane Fiona          | 90%        | 34    |
| Philippines        | Typhoon Imbudo / Harurot | 98%        | 41    |
| Honduras           | Hurricane Mitch          | 100%       | 71    |
| Martinique         | Hurricane Dean           | 100%       | 36    |
| Martinique         | Hurricane Dean           | 100%       | 41    |
| Dominica           | Hurricane David          | 100%       | 44    |
| Southern Mexico    | Hurricane Grace          | 100%       | 45    |
| The Philippines    | Typhoon Pablo (Bopha)    | 100%       | 68    |
| Jamaica            | Hurricane Gilbert        | 100%       | 72    |
| Jamaica            | Hurricane Allen          | 100%       | 75    |

| Windspeed interval | Average damage | Saffir Simps | Damage level  |
|--------------------|----------------|--------------|---------------|
| 0-10               | 0%             | No           | No Damage     |
| 10-25              | 48%            | No           | Severe damage |
| 26-43              | 84%            | 1-3          | Major damage  |
| 44>                | 96%            | 3-5          | Complete      |
